# Supplementary material
Source: ML conference proceedings conference paper supplement (https://openaccess.thecvf.com/content/ICCV2021/html/Cui_LookOut_Diverse_Multi-Future_ICCV_2021_paper.html)
Supplement: Supplementary file 2 [file Cui_LookOut_Diverse_Multi-Future_ICCV_2021_supplemental.zip]

Archive with 3 entries (2 files):
- 07104-supp/
- 07104-supp/lookout_supp.pdf
- 07104-supp/lookout_supp_video.mp4
